# Supplementary material for: Renal Injury during Long-Term Crizotinib Therapy
Source: PubMed Central journal article supplement (PMC6213486; doi:10.3390/ijms19102902), 2018-09-25
Supplement: ijms-19-02902-s001.pdf [file ijms-19-02902-s001.pdf]

## **Supplemental Materials**

### **Renal Injury during Long-term Crizotinib Therapy**

Taro Yasuma, Tetsu Kobayashi, Corina N. D'Alessandro-Gabazza, Hajime Fujimoto,

Kentaro Ito, Yoichi Nishii, Kota Nishihama, Prince Baffour Tonto, Atsuro Takeshita,

Masaaki Toda, Esteban C. Gabazza, Osamu Taguchi, Shigenori Yonemura, Osamu Hataji.

**Supplementary Table 1. Antibodies used in the experimental mouse model**

---

| Antibodies           | Catalog No | Host and type         | Company (city, state /country)          |
|----------------------|------------|-----------------------|-----------------------------------------|
| Primary antibodies   |            |                       |                                         |
| Anti-phospho-c-MET   | AF2480     | Rabbit polyclonal IgG | R&D System (Minneapolis, MN)            |
| Anti-c-MET           | AF527      | Goat polyclonal IgG   | R&D System (Minneapolis, MN)            |
| Anti-phospho-STAT3   | sc-8059    | Mouse monoclonal IgG  | Santa Cruz (Santa Cruz, CA)             |
| Anti-STAT3           | sc-8019    | Mouse monoclonal IgG  | Santa Cruz (Santa Cruz, CA)             |
| Anti-phospho-ERK1/2  | sc-7383    | Mouse monoclonal IgG  | Santa Cruz (Santa Cruz, CA)             |
| Anti-ERK1/2          | sc-514302  | Mouse monoclonal IgG  | Santa Cruz (Santa Cruz, CA)             |
| Anti-phospho-Smad2   | #3104      | Rabbit polyclonal IgG | Cell Signaling Technology (Danvers, MA) |
| Anti-Smad2           | #3122      | Rabbit monoclonal IgG | Cell Signaling Technology (Danvers, MA) |
| Anti-phospho-IkB     | #4792      | Rabbit monoclonal IgG | Cell Signaling Technology (Danvers, MA) |
| Anti-IkB             | #4812      | Rabbit monoclonal IgG | Cell Signaling Technology (Danvers, MA) |
| Anti-phospho-AKT     | sc-514032  | Mouse monoclonal IgG  | Santa Cruz (Santa Cruz, CA)             |
| Anti-AKT             | sc-81434   | Mouse monoclonal IgG  | Santa Cruz (Santa Cruz, CA)             |
| Anti-beta Actin      | #4970      | Rabbit monoclonal IgG | CST, (Danvers, MA)                      |
| Secondary antibodies |            |                       |                                         |
| Anti-rabbit IgG-HRP  | #172-1019  | Goat polyclonal IgG   | Bio Rad (Hercules, CA)                  |
| Anti-goat IgG-HRP    | #172-1034  | Rabbit polyclonal IgG | Bio Rad (Hercules, CA)                  |
| Anti-mouse IgG-HRP   | #170-6516  | Goat polyclonal IgG   | Bio Rad (Hercules, CA)                  |

---

**Supplementary Table 2. Sequence of PCR primers**

| Gene            | Direction | Sequence (5' to 3')     | Reference | Location  | Amplicon size |
|-----------------|-----------|-------------------------|-----------|-----------|---------------|
| mGapdh          | sense     | TGGCCTTCCGTGTTCTAC      | NM 008084 | 686-704   | 178 bp        |
|                 | antisense | GAGTTGCTGTTGAAGTCGCA 20 | 863-844   |           |               |
| mIL-6           | sense     | CTGGTCTTCTGGAGTACCATAG  | NM 031168 | 375-396   | 374 bp        |
|                 | antisense | AAGTCAGATACCTGACAACAGG  | 748-727   |           |               |
| mTNF- $\alpha$  | sense     | ACGTGGAAGTGGCAGAAGAG    | NM 013693 | 182-201   | 284 bp        |
|                 | antisense | CTCCTCCACTTGGTGGTTTG 20 | 465-446   |           |               |
| mTGF- $\beta$ 1 | sense     | ACTCCACGTGGAAATCAACGG   | NM 011577 | 1560-1580 | 414 bp        |
|                 | antisense | TAGTAGACGATGGGCAGTGG 20 | 1973-1954 |           |               |
| mMMP-2          | sense     | CACCACCGAGGACTATGACC 20 | NM 008610 | 954-973   | 122 bp        |
|                 | antisense | TGTTGCCCAGGAAAGTGAAG 20 | 1075-1056 |           |               |
| mColla1         | sense     | TAAGGGTCCCAATGGTGAGA    | NM 007742 | 107-127   | 203 bp        |

PCR, polymerase chain reaction; m, mouse; Gapdh, Glyceraldehyde 3-phosphate dehydrogenase; IL-6, interleukin-6; TNF- $\alpha$ , tumor necrosis factor- $\alpha$ ; TGF- $\beta$ 1, transforming growth factor- $\beta$ 1; MMP2, matrix metalloproteinase-2.
